# Supplementary material for: Prevalence and dynamics of NAFLD-associated fibrosis in people living with HIV in Vienna from first presentation to last follow-up
Source: Springer Nature journal article supplement (doi:10.1007/s00508-022-02133-9), 2022-12-28

Supplementary figure 1

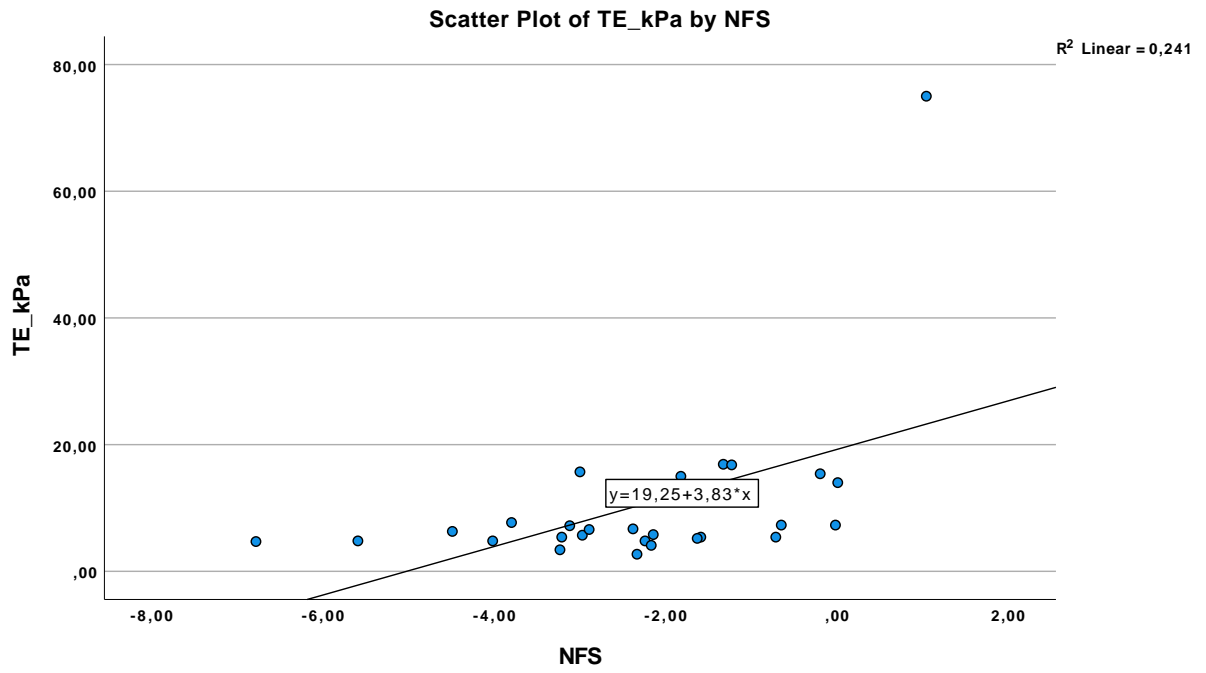

Supplement: MOESM1 [file 23864870]
